# Supplementary material for: Gene therapy for retinal diseases: From genetics to treatment
Source: PubMed Central journal article supplement — Indian J Ophthalmol. 2024 Jul 29;72(8):1091–101. doi: 10.4103/IJO.IJO_2902_23 (PMC11451791; doi:10.4103/ijo.ijo_2902_23), 2024-07-29
Supplement: IJO-72-1091_Suppl1.pdf [file IJO-72-1091_Suppl1.pdf]

**Table S1: Clinical trials categorized based on specific retinal diseases as reported in clinicaltrials.gov**

| NCT Number | Study Title                                                                                                                                                                                                              | Acronym | Study Status          | Conditions                                                                                                                                                          | Interventions                                                            | Phases          | Start Date | Completion Date |
|------------|--------------------------------------------------------------------------------------------------------------------------------------------------------------------------------------------------------------------------|---------|-----------------------|---------------------------------------------------------------------------------------------------------------------------------------------------------------------|--------------------------------------------------------------------------|-----------------|------------|-----------------|
| 1          | Usher Syndrome<br>NCT02065011<br>A Study to Determine the Long-Term Safety, Tolerability and Biological Activity of SAR421869 in Patients With Usher Syndrome Type 1B                                                    |         | ACTIVE_NOT_RECRUITING | Usher's Syndrome                                                                                                                                                    | DRUG: Blood draw for the laboratory assessment                           | PHASE1   PHASE2 | 12-09-2013 | 13-06-2031      |
| 2          | Usher Syndrome and RP<br>NCT05176717<br>Study to Evaluate the Efficacy Safety and Tolerability of QR-421a in Subjects With RP Due to Mutations in Exon 13 of the USH2A Gene With Early to Moderate Vision Loss (Celeste) |         | TERMINATED            | Retinitis Pigmentosa   Usher Syndrome Type 2   Deaf Blind   Retinal Disease   Eye Diseases   Eye Diseases, Hereditary   Eye Disorders Congenital   Vision Disorders | DRUG: QR-421a   OTHER: Sham-procedure                                    | PHASE2   PHASE3 | 15-12-2021 | 02-08-2022      |
| 3          | NCT05085964<br>An Open-Label Extension Study to Evaluate Safety & Tolerability of QR-421a in Subjects With Retinitis Pigmentosa                                                                                          | HELIA   | TERMINATED            | Retinitis Pigmentosa   Usher Syndrome Type 2                                                                                                                        | DRUG: RNA antisense oligonucleotide for intravitreal injection           | PHASE2          | 16-09-2021 | 18-10-2022      |
| 4          | NCT03780257<br>Study to Evaluate Safety and Tolerability of QR-421a in Subjects With RP Due to Mutations in Exon 13 of the USH2A Gene                                                                                    | Stellar | COMPLETED             | Retinitis Pigmentosa   Usher Syndrome Type 2   Deaf Blind   Retinal Disease   Eye Diseases   Eye Diseases, Hereditary   Eye Disorders Congenital   Vision Disorders | DRUG: QR-421a   OTHER: Sham-procedure (dose cohort 1&2 only)             | PHASE1   PHASE2 | 06-03-2019 | 14-10-2021      |
| 5          | NCT05158296<br>Study to Evaluate the Efficacy Safety and Tolerability of Ulteversen in Subjects With RP Due to Mutations in Exon 13 of the USH2A Gene (Sirius)                                                           |         | ACTIVE_NOT_RECRUITING | Retinitis Pigmentosa   Usher Syndrome Type 2   Deaf Blind   Retinal Disease   Eye Diseases   Eye Diseases, Hereditary   Eye Disorders Congenital   Vision Disorders | DRUG: Ulteversen   OTHER: Sham-procedure                                 | PHASE2   PHASE3 | 08-12-2021 | 2024-12         |
| 6          | NCT01505062<br>Study of SAR421869 in Participants With Retinitis Pigmentosa Associated With Usher Syndrome Type 1B                                                                                                       |         | TERMINATED            | Usher Syndrome   Retinitis Pigmentosa                                                                                                                               | DRUG: SAR421869                                                          | PHASE1   PHASE2 | 26-03-2012 | 16-08-2019      |
| 1          | RP<br>NCT04945772<br>Efficacy and Safety of MCO-010 Optogenetic Therapy in Adults With Retinitis Pigmentosa [RESTORE]                                                                                                    | RESTORE | ACTIVE_NOT_RECRUITING | Retinitis Pigmentosa   Retinitis   Retinal Diseases   Eye Diseases   Eye Diseases, Hereditary   Retinal Dystrophies   Retinal Degeneration                          | BIOLOGICAL: Gene Therapy<br>Product: MCO-010   PROCEDURE: Sham Injection | PHASE2          | 13-07-2021 | 01-03-2024      |
| 2          | NCT04611503<br>PDE6A Gene Therapy for Retinitis Pigmentosa                                                                                                                                                               | Pigment | ACTIVE_NOT_RECRUITING | Retinitis Pigmentosa                                                                                                                                                | DRUG: subretinal injection of rAAV.hPDE6A                                | PHASE1   PHASE2 | 24-09-2019 | 2027-07         |

Contid...

|    |             |                                                                                                                                                                              |         |                         |                                                                |                                                                     |                 |            |            |
|----|-------------|------------------------------------------------------------------------------------------------------------------------------------------------------------------------------|---------|-------------------------|----------------------------------------------------------------|---------------------------------------------------------------------|-----------------|------------|------------|
| 3  | NCT05203939 | Study to Assess the Safety and Efficacy of OC400 for Retinitis Pigmentosa and Leber Congenital Amaurosis                                                                     |         | RECRUITING              | Retinitis Pigmentosa   Leber Congenital Amaurosis              | DRUG: OC400 Low Dose   DRUG: OC400 Med Dose   DRUG: OC400 High Dose | PHASE1   PHASE2 | 24-01-2022 | 2024-02    |
| 4  | NCT05805007 | Safety and Tolerability Study of Gene Editing Drug ZVS203e in Participants With Retinitis Pigmentosa                                                                         |         | NOT_YET_RECRUITING      | Retinitis Pigmentosa                                           | DRUG: ZVS203e                                                       | EARLY_PHASE1    | 2023-06    | 2026-04    |
| 5  | NCT03252847 | Gene Therapy for X-linked Retinitis Pigmentosa (XLRP) - Retinitis Pigmentosa GTPase Regulator (RPGR)                                                                         |         | COMPLETED               | X-Linked Retinitis Pigmentosa                                  | GENETIC: AAV2/J5-RPGR                                               | PHASE1   PHASE2 | 14-07-2017 | 18-11-2021 |
| 6  | NCT02416622 | Safety and Efficacy of rAAV-hRS1 in Patients With X-linked Retinoschisis (XLRs)                                                                                              |         | COMPLETED               | X-linked Retinoschisis                                         | BIOLOGICAL: rAAV21YF-CB-hRS1                                        | PHASE1   PHASE2 | 2015-05    | 09-05-2023 |
| 7  | NCT03328130 | Safety and Efficacy Study in Patients With Retinitis Pigmentosa Due to Mutations in PDE6B Gene                                                                               |         | RECRUITING              | Retinitis Pigmentosa                                           | BIOLOGICAL: AAV2/J5-hPDE6B                                          | PHASE1   PHASE2 | 06-11-2017 | 2029-12    |
| 8  | NCT04278131 | BS01 in Patients With Retinitis Pigmentosa                                                                                                                                   |         | RECRUITING              | Retinitis Pigmentosa                                           | DRUG: BS01                                                          | PHASE1   PHASE2 | 06-02-2020 | 30-12-2029 |
| 9  | NCT05921162 | A Long-Term Follow-Up Study in Subjects Who Received VMCO-1 Administered Via Intravitreal Injection                                                                          | EXTEND  | ENROLLING_BY_INVITATION | Retinitis Pigmentosa   Retinal Disease   Retinal Degeneration  | BIOLOGICAL: Gene Therapy product:VMCO-1                             |                 | 14-07-2023 | 2024-12    |
| 10 | NCT05748873 | Promising Rod-cone Dystrophy Gene therapy                                                                                                                                    | PRODIGY | RECRUITING              | Retinitis Pigmentosa                                           | DRUG: SPVN06                                                        | PHASE1   PHASE2 | 12-04-2023 | 2029-03    |
| 11 | NCT04312672 | Long Term Follow-Up Gene Therapy Study for XLRP RPGR                                                                                                                         |         | RECRUITING              | X-Linked Retinitis Pigmentosa                                  | BIOLOGICAL: AAV-RPGR                                                |                 | 18-02-2019 | 2023-06    |
| 12 | NCT03316560 | Safety and Efficacy of rAAV21YF-GRK1-RPGR in Subjects With X-linked Retinitis Pigmentosa Caused by RPGR Mutations                                                            |         | RECRUITING              | X-Linked Retinitis Pigmentosa                                  | BIOLOGICAL: rAAV21YF-GRK1-RPGR                                      | PHASE1   PHASE2 | 16-04-2018 | 2026-08    |
| 13 | NCT05874310 | Gene Therapy for Subjects With RPGR Mutation-associated X-linked Retinitis Pigmentosa                                                                                        |         | RECRUITING              | X-Linked Retinitis Pigmentosa                                  | GENETIC: FT-002                                                     | EARLY_PHASE1    | 01-02-2023 | 01-11-2027 |
| 14 | NCT04919473 | Dose-Escalation Study to Evaluate the Safety and Tolerability of Intravitreal VMCO-1 in Patients With Advanced Retinitis Pigmentosa                                          |         | COMPLETED               | Retinitis Pigmentosa   Retinal Diseases   Retinal Degeneration | BIOLOGICAL: Gene Therapy product:VMCO-1                             | PHASE1   PHASE2 | 23-10-2019 | 31-10-2020 |
| 15 | NCT04850118 | A Clinical Trial Evaluating the Safety and Efficacy of a Single Subretinal Injection of AGTC-501 in Participants With X-linked Retinitis Pigmentosa Caused by RPGR Mutations |         | NOT_YET_RECRUITING      | X-Linked Retinitis Pigmentosa                                  | BIOLOGICAL: rAAV21YF-GRK1-hRPGRco                                   | PHASE2   PHASE3 | 2021-08    | 2029-03    |

Contd...

|    |             |                                                                                                                                       |         |                       |                                                                 |                                                                                               |               |            |            |
|----|-------------|---------------------------------------------------------------------------------------------------------------------------------------|---------|-----------------------|-----------------------------------------------------------------|-----------------------------------------------------------------------------------------------|---------------|------------|------------|
| 16 | NCT03326336 | Dose-escalation Study to Evaluate the Safety and Tolerability of GS030 in Subjects With Retinitis Pigmentosa                          | PIONEER | RECRUITING            | Non-syndromic Retinitis Pigmentosa                              | COMBINATION_PRODUCT: Gene therapy: GS030-DP AND Medical device: GS030-MD                      | PHASE1 PHASE2 | 26-09-2018 | 2025-12    |
| 17 | NCT03116113 | A Clinical Trial of Retinal Gene Therapy for X-linked Retinitis Pigmentosa Using B1B112                                               | XIRIUS  | COMPLETED             | X-Linked Retinitis Pigmentosa                                   | BIOLOGICAL: B1B112                                                                            | PHASE1 PHASE2 | 16-03-2017 | 18-11-2020 |
| 18 | NCT02556736 | RST-001 Phase I/II Trial for Advanced Retinitis Pigmentosa                                                                            |         | ACTIVE_NOT_RECRUITING | Advanced Retinitis Pigmentosa                                   | DRUG: RST-001                                                                                 | PHASE1 PHASE2 | 14-12-2015 | 02-09-2024 |
| 19 | NCT04794101 | Follow-up Gene Therapy Trial for the Treatment of X-linked Retinitis Pigmentosa Associated With Variants in the RPGR Gene             |         | RECRUITING            | X-Linked Retinitis Pigmentosa                                   | BIOLOGICAL: Genetic: AAV5-RPGR 4e11   BIOLOGICAL: Genetic: AAV5-RPGR 2e11                     | PHASE3        | 16-03-2021 | 2029-05    |
| 20 | NCT03374657 | A First-in-human, Proof of Concept Study of CPK850 in Patients With RLPB1 Retinitis Pigmentosa                                        |         | ACTIVE_NOT_RECRUITING | Retinitis Pigmentosa                                            | BIOLOGICAL: CPK850                                                                            | PHASE1 PHASE2 | 22-08-2018 | 11-05-2026 |
| 21 | NCT01482195 | Trial of Subretinal Injection of (rAAV2-VMD2-hMERTK)                                                                                  |         | COMPLETED             | Retinal Disease   Retinitis Pigmentosa                          | BIOLOGICAL: Subretinal administration of rAAV2-VMD2-hMERTK recombinant Adeno-Associated Virus | PHASE1        | 2011-08    | 2019-08    |
| 22 | NCT05926583 | A Study of AAV5-hRkP.RPGR for the Treatment of Japanese Participants With X-linked Retinitis Pigmentosa                               |         | RECRUITING            | X-Linked Retinitis Pigmentosa                                   | GENETIC: AAV5-hRkP.RPGR   GENE TIC: AAV5-hRkP.RPGR                                            | PHASE3        | 21-08-2023 | 10-05-2029 |
|    | RP/LCA      |                                                                                                                                       |         |                       |                                                                 |                                                                                               |               |            |            |
| 23 | NCT05858983 | Gene Therapy in Subjects With Biallelic RPE65 Mutation-associated Retinal Dystrophy                                                   |         | RECRUITING            | Biallelic RPE65 Mutation-associated Retinal Dystrophy           | GENETIC: FT-001 Low Dose   GENETIC: FT-001 Mid Dose   GENETIC: FT-001 High Dose               | PHASE1 PHASE2 | 30-11-2022 | 30-11-2029 |
| 24 | NCT03602820 | Long-term Follow-up Study in Subjects Who Received Voretigene Neparvovec-rzy1 (AAV2-hRPE65v2)                                         |         | ACTIVE_NOT_RECRUITING | Inherited Retinal Dystrophy Due to RPE65 Mutations              | BIOLOGICAL: AAV2-hRPE65v2                                                                     |               | 2015-06    | 2030-06    |
| 25 | NCT04516369 | Study of Efficacy and Safety of Voretigene Neparvovec in Japanese Patients With Biallelic RPE65 Mutation-associated Retinal Dystrophy |         | ACTIVE_NOT_RECRUITING | Biallelic RPE65 Mutation-associated Retinal Dystrophy           | GENETIC: voretigene neparvovec                                                                | PHASE3        | 24-11-2020 | 31-05-2026 |
| 26 | NCT03597399 | A Patient Registry Study for Patients Treated With Voretigene Neparvovec in US                                                        |         | ACTIVE_NOT_RECRUITING | Confirmed Biallelic RPE65 Mutation-associated Retinal Dystrophy | BIOLOGICAL: AAV2-hRPE65v2, voretigene neparvovec-rzy1                                         |               | 10-01-2019 | 2025-06    |
|    | LCA         |                                                                                                                                       |         |                       |                                                                 |                                                                                               |               |            |            |

Contd...

|    |             |                                                                                                                                      |            |                       |                                                                                                                                                                                                                  |                                                       |               |            |            |
|----|-------------|--------------------------------------------------------------------------------------------------------------------------------------|------------|-----------------------|------------------------------------------------------------------------------------------------------------------------------------------------------------------------------------------------------------------|-------------------------------------------------------|---------------|------------|------------|
| 27 | NCT03913130 | Extension Study to Study PQ-110-001 (NCT03140969)                                                                                    | INSIGHT    | TERMINATED            | Leber Congenital Amaurosis 10 Blindness Leber Congenital Amaurosis Vision Disorders Sensation Disorders Neurologic Manifestations Eye Diseases Eye Diseases, Hereditary Eye Disorders Congenital Retinal Disease | DRUG: QR-110                                          | PHASE1 PHASE2 | 13-05-2019 | 03-10-2022 |
| 28 | NCT02946879 | Long-Term Follow-Up Gene Therapy Study for Leber Congenital Amaurosis OPTIRPE65 (Retinal Dystrophy Associated With Defects in RPE65) |            | COMPLETED             | Leber Congenital Amaurosis (LCA) Eye Diseases Eye Diseases, Hereditary Retinal Diseases                                                                                                                          | BIOLOGICAL: AAV OPTIRPE65                             |               | 2016-11    | 16-06-2023 |
| 29 | NCT03872479 | Single Ascending Dose Study in Participants With LCA10                                                                               |            | ACTIVE_NOT_RECRUITING | Leber Congenital Amaurosis 10 Inherited Retinal Dystrophies Eye Diseases, Hereditary Retinal Disease Retinal Degeneration Vision Disorders Eye Disorders Congenital                                              | DRUG: EDIT-101                                        | PHASE1 PHASE2 | 26-09-2019 | 23-05-2025 |
| 30 | NCT03913143 | A Study to Evaluate Efficacy, Safety, Tolerability and Exposure After a Repeat-dose of Sepofarsen (QR-110) in LCA10 (ILLUMINATE)     | ILLUMINATE | ACTIVE_NOT_RECRUITING | Leber Congenital Amaurosis 10 Blindness Leber Congenital Amaurosis Vision Disorders Sensation Disorders Neurologic Manifestations Eye Diseases Eye Diseases, Hereditary Eye Disorders Congenital Retinal Disease | DRUG: sepfarsen OTHER: Sham                           | PHASE2 PHASE3 | 04-04-2019 | 2023-03    |
| 31 | NCT00643747 | Safety Study of RPE65 Gene Therapy to Treat Leber Congenital Amaurosis                                                               |            | COMPLETED             | Retinal Degeneration                                                                                                                                                                                             | BIOLOGICAL: tgAAAG76 (rAAV 2/2.hrPE65p.hrPE65)        | PHASE1 PHASE2 | 2007-01    | 2014-12    |
| 32 | NCT01208389 | Phase 1 Follow-on Study of AAV2-hRPE65v2 Vector in Subjects With Leber Congenital Amaurosis (LCA) 2                                  |            | ACTIVE_NOT_RECRUITING | Leber Congenital Amaurosis                                                                                                                                                                                       | BIOLOGICAL: voretigene neparvovect-ryyl               | PHASE1 PHASE2 | 2010-11    | 2030-06    |
| 33 | NCT00481546 | Phase I Trial of Gene Vector to Patients With Retinal Disease Due to RPE65 Mutations                                                 | LCA        | ACTIVE_NOT_RECRUITING | Amaurosis of Leber Retinal Diseases                                                                                                                                                                              | GENETIC: rAAV2-CBSB-hRPE65                            | PHASE1        | 2007-07    | 2026-06    |
| 34 | NCT05906953 | A Safety and Efficacy Study of HG004 in Subjects With Leber Congenital Amaurosis                                                     |            | NOT_YET_RECRUITING    | Leber Congenital Amaurosis                                                                                                                                                                                       | DRUG: HG004                                           | PHASE1 PHASE2 | 2023-09    | 2025-12    |
| 35 | NCT00999609 | Safety and Efficacy Study in Subjects With Leber Congenital Amaurosis                                                                |            | ACTIVE_NOT_RECRUITING | Inherited Retinal Dystrophy Due to RPE65 Mutations Leber Congenital Amaurosis                                                                                                                                    | BIOLOGICAL: AAV2-hRPE65v2,voretigene neparvovect-ryyl | PHASE3        | 2012-10    | 2029-07    |

Contd...

|    |                             |                                                                                                                                                                                                                  |           |                    |                                                                                                                                                                                                                                  |                                                                                           |               |            |            |
|----|-----------------------------|------------------------------------------------------------------------------------------------------------------------------------------------------------------------------------------------------------------|-----------|--------------------|----------------------------------------------------------------------------------------------------------------------------------------------------------------------------------------------------------------------------------|-------------------------------------------------------------------------------------------|---------------|------------|------------|
| 36 | NCT05616793                 | Safety and Tolerability Subretinal OPX-001 for LCA5-Associated Inherited Retinal Degeneration (LCA5-IRD)                                                                                                         |           | RECRUITING         | LCA5                                                                                                                                                                                                                             | BIOLOGICAL: AAV8.hLCA5                                                                    | PHASE1 PHASE2 | 15-06-2023 | 30-09-2027 |
| 37 | NCT04855045                 | An Open-label, Dose Escalation and Double-masked, Randomized, Controlled Trial Evaluating Safety and Tolerability of Sepofarsen in Children (<8 Years of Age) With LCA10 Caused by Mutations in the CEP290 Gene. | BRIGHTEN  | RECRUITING         | Leber Congenital Amaurosis 10 Blindness Leber Congenital Amaurosis Vision Disorders Sensation Disorders Neurologic Manifestations Eye Diseases Eye Disorders Congenital Retinal Disease Retinal Degeneration Retinal Dystrophies | DRUG: sepofarsen                                                                          | PHASE2 PHASE3 | 23-03-2021 | 2023-12    |
| 38 | NCT00821340                 | Clinical Trial of Gene Therapy for Leber Congenital Amaurosis Caused by RPE65 Mutations                                                                                                                          |           | COMPLETED          | Leber Congenital Amaurosis                                                                                                                                                                                                       | GENETIC: rAAV2-hRPE65                                                                     | PHASE1        | 01-02-2009 | 01-01-2017 |
| 39 | NCT00749957                 | Phase 1/2 Safety and Efficacy Study of AAV-RPE65 Vector to Treat Leber Congenital Amaurosis                                                                                                                      |           | COMPLETED          | Leber Congenital Amaurosis                                                                                                                                                                                                       | BIOLOGICAL: rAAV2-CB-hRPE65                                                               | PHASE1 PHASE2 | 17-06-2009 | 22-09-2017 |
| 40 | NCT03140969                 | Study to Evaluate QR-110 in Leber's Congenital Amaurosis (LCA) Due to the c.2991+1655A>G Mutation (p.Cys998X) in the CEP290 Gene                                                                                 |           | COMPLETED          | Leber's Congenital Amaurosis                                                                                                                                                                                                     | DRUG: QR-110                                                                              | PHASE1 PHASE2 | 16-10-2017 | 02-10-2019 |
| 41 | NCT00516477                 | Safety Study in Subjects With Leber Congenital Amaurosis                                                                                                                                                         |           | COMPLETED          | Leber Congenital Amaurosis                                                                                                                                                                                                       | BIOLOGICAL: voretigene neparvovec-rzyl                                                    | PHASE1        | 2007-09    | 20-03-2018 |
| 42 | NCT02781480                 | Clinical Trial of Gene Therapy for the Treatment of Leber Congenital Amaurosis (LCA)                                                                                                                             | OPTIRPE65 | COMPLETED          | Leber Congenital Amaurosis                                                                                                                                                                                                       | BIOLOGICAL: AAV RPE65                                                                     | PHASE1 PHASE2 | 2016-04    | 2018-12    |
| 43 | NCT01496040                 | Clinical Gene Therapy Protocol for the Treatment of Retinal Dystrophy Caused by Defects in RPE65                                                                                                                 | RPE65     | COMPLETED          | Leber Congenital Amaurosis                                                                                                                                                                                                       | DRUG: rAAV2/4-hRPE65                                                                      | PHASE1 PHASE2 | 2011-09    | 2014-08    |
| 44 | nAMD/Wet AMD<br>NCT05986864 | Phase I/II Study to Evaluate the Safety, Preliminary Efficacy, Immunogenicity, and Pharmacokinetics of SKG0106 Intraocular Solution in Patients With Neovascular Age-related Macular Degeneration (nAMD)         |           | NOT_YET_RECRUITING | Neovascular Age-related Macular Degeneration                                                                                                                                                                                     | GENETIC: SKG0106                                                                          | PHASE1 PHASE2 | 30-10-2023 | 30-09-2029 |
| 45 | NCT03585556                 | AAVCAGsCD59 for the Treatment of Wet AMD                                                                                                                                                                         |           | COMPLETED          | Wet Age-related Macular Degeneration                                                                                                                                                                                             | DRUG: Intravitreal anti-VEGF BIOLOGICAL: Intravitreal AAVCAGsCD59 DRUG: Oral prednisolone | PHASE1        | 13-09-2018 | 18-01-2022 |

|    |             |                                                                                                                                         |            |                       |                                                                                                                                                                |                                                                                                                                           |               |            |            |
|----|-------------|-----------------------------------------------------------------------------------------------------------------------------------------|------------|-----------------------|----------------------------------------------------------------------------------------------------------------------------------------------------------------|-------------------------------------------------------------------------------------------------------------------------------------------|---------------|------------|------------|
| 46 | NCT04704921 | Pivotal 1 Study of RGX-314 Gene Therapy in Participants With nAMD                                                                       | ATMOSPHERE | RECRUITING            | AMD nAMD Wet Age-related Macular Degeneration wAMD Wet AMD CNV                                                                                                 | GENETIC: RGX-314 GENETIC: RGX-314 BIOLOGICAL: Ranibizumab (LUCENTIS®)                                                                     | PHASE2 PHASE3 | 29-12-2020 | 2026-05    |
| 47 | NCT04645212 | Long-term Study of ADVM-022 in Neovascular (Wet) AMD [OPTIC-EXT]                                                                        |            | ACTIVE_NOT_RECRUITING | Wet Age-related Macular Degeneration Neovascular Age-related Macular Degeneration                                                                              | BIOLOGICAL: ADVM-022                                                                                                                      |               | 14-12-2020 | 2025-06    |
| 48 | NCT05536973 | Safety and Efficacy of ADVM-022 in Treatment-Experienced Patients With Neovascular Age-related Macular Degeneration [LUNA]              |            | RECRUITING            | Neovascular Age-related Macular Degeneration                                                                                                                   | GENETIC: ADVM-022 GENETIC: ADVM-022                                                                                                       | PHASE2        | 23-08-2022 | 2024-02    |
| 49 | NCT04514653 | RGX-314 Gene Therapy Administered in the Suprachoroidal Space for Participants With Neovascular Age-Related Macular Degeneration (nAMD) | AAVIATE    | RECRUITING            | Neovascular Age-Related Macular Degeneration (nAMD)                                                                                                            | GENETIC: RGX-314 Dose 1 GENETIC: RGX-314 Dose 2 BIOLOGICAL: Ranibizumab GENETIC: RGX-314 Dose 3 DRUG: Local steroid DRUG: Topical steroid | PHASE2        | 25-08-2020 | 2024-01    |
| 50 | NCT05099094 | VEGFA-targeting Gene Therapy to Treat Retinal and Choroidal Neovascularization Diseases                                                 |            | RECRUITING            | Neovascular Age-related Macular Degeneration Diabetic Macular Edema Retinal Vein Occlusion                                                                     | GENETIC: BD311                                                                                                                            | EARLY_PHASE1  | 25-11-2021 | 2023-09    |
| 51 | NCT06031727 | CRISPR/Cas13-mediated RNA Targeting Therapy for the Treatment of nAMD Investigator-Initiated Trial (SIGHT-I)                            |            | NOT_YET_RECRUITING    | Neovascular Age-related Macular Degeneration(nAMD)                                                                                                             | GENETIC: HG202                                                                                                                            | EARLY_PHASE1  | 30-09-2023 | 27-06-2025 |
| 52 | NCT01494805 | Safety and Efficacy Study of rAAV.sFlt-1 in Patients With Exudative Age-Related Macular Degeneration                                    | AMD        | COMPLETED             | Macular Degeneration Age-related Maculopathies Age-related Maculopathy Maculopathies, Age-related Retinal Degeneration Retinal Neovascularization Eye Diseases | BIOLOGICAL: rAAV.sFlt-1 BIOLOGICAL: rAAV.sFlt-1 OTHER: Control (ranibizumab alone)                                                        | PHASE1 PHASE2 | 2011-12    | 2017-08    |
| 53 | NCT05903794 | A Study of EXG102-031 in Patients With wAMD (Everest)                                                                                   |            | RECRUITING            | Neovascular (Wet) Age-related Macular Degeneration (nAMD)                                                                                                      | BIOLOGICAL: EXG102-031                                                                                                                    | PHASE1        | 24-07-2023 | 31-12-2025 |
| 54 | NCT05407636 | Pivotal 2 Study of RGX-314 Gene Therapy in Participants With nAMD                                                                       | ASCENT     | RECRUITING            | AMD nAMD Wet Age-related Macular Degeneration wAMD WetAMD CNV                                                                                                  | GENETIC: RGX-314 Dose 1 GENETIC: RGX-314 Dose 2 BIOLOGICAL: Aflibercept (EYLEA®)                                                          | PHASE3        | 28-12-2021 | 2025-12    |

Contd...

|    |             |                                                                                                                  |                |                         |                                                                                                                                                                                                                                      |                                                                                                                   |                 |            |            |
|----|-------------|------------------------------------------------------------------------------------------------------------------|----------------|-------------------------|--------------------------------------------------------------------------------------------------------------------------------------------------------------------------------------------------------------------------------------|-------------------------------------------------------------------------------------------------------------------|-----------------|------------|------------|
| 55 | NCT01024998 | Safety and Tolerability Study of AAV2-sFLT01 in Patients With Neovascular Age-Related Macular Degeneration (AMD) |                | COMPLETED               | Macular Degeneration   Age-Related Maculopathies   Age-Related Maculopathy   Maculopathies, Age-Related   Maculopathy, Age-Related   Retinal Degeneration   Retinal Neovascularization   Gene Therapy   Therapy, Gene   Eye Diseases | BIOLOGICAL:<br>AAV2-sFLT01   BIOLOGICAL:<br>AAV2-sFLT01   BIOLOGICAL:<br>AAV2-sFLT01   BIOLOGICAL:<br>AAV2-sFLT01 | PHASE1          | 11-01-2010 | 2018-07    |
| 56 | NCT05611424 | Gene Therapy for Wet AMD                                                                                         |                | NOT_YET_RECRUITING      | Neovascular Age-related Macular Degeneration                                                                                                                                                                                         | GENETIC: FT-003                                                                                                   | PHASE1          | 01-05-2023 | 30-12-2027 |
| 57 | NCT05197270 | 4D-150 in Patients With Neovascular (Wet) Age-Related Macular Degeneration                                       |                | RECRUITING              | Neovascular (Wet) Age-Related Macular Degeneration                                                                                                                                                                                   | BIOLOGICAL: 4D-150 IVT   BIOLOGICAL: Aflibercept IVT                                                              | PHASE1   PHASE2 | 09-12-2021 | 2025-11    |
| 58 | NCT03999801 | Long-term Follow-Up Study of RGX-314 and Fellow Eye Substudy                                                     | RGX-314 SRLTFU | ENROLLING_BY_INVITATION | Neovascular Age-related Macular Degeneration   Wet Macular Degeneration                                                                                                                                                              | GENETIC: RGX-314                                                                                                  | PHASE2          | 31-05-2019 | 2028-12    |
| 59 | NCT03748784 | ADVM-022 Intravitreal Gene Therapy for Wet AMD                                                                   | OPTIC          | COMPLETED               | Wet Age-related Macular Degeneration   Neovascular Age-related Macular Degeneration                                                                                                                                                  | BIOLOGICAL: ADVM-022                                                                                              | PHASE1          | 14-11-2018 | 22-06-2022 |
| 60 | NCT03066258 | Safety and Tolerability of RGX-314 (Investigational Product) Gene Therapy for Neovascular AMD Trial              |                | COMPLETED               | Neovascular Age-related Macular Degeneration   Wet Age-related Macular Degeneration                                                                                                                                                  | GENETIC: RGX-314                                                                                                  | PHASE1   PHASE2 | 29-03-2017 | 17-06-2021 |
| 61 | NCT05657301 | Safety and Tolerability of KH631 Gene Therapy in Participants With Neovascular Age-related Macular Degeneration  |                | RECRUITING              | Age-Related Macular Degeneration                                                                                                                                                                                                     | DRUG: KH631                                                                                                       | PHASE1          | 2023-08    | 2027-09    |
| 62 | NCT04832724 | RGX-314 Gene Therapy Pharmacodynamic Study for Neovascular Age-related Macular Degeneration (nAMD)               |                | ACTIVE_NOT_RECRUITING   | Neovascular Age-related Macular Degeneration   Wet Macular Degeneration   Wet Age-related Macular Degeneration                                                                                                                       | GENETIC: RGX-314                                                                                                  | PHASE2          | 22-02-2021 | 18-03-2024 |
| 63 | NCT06022744 | An Exploratory Clinical Trial Evaluating LX109 Gene Therapy in Patients With nAMD                                |                | NOT_YET_RECRUITING      | To Evaluate the Safety and Tolerability of Intravitreal Injection of LX109 in Patients With nAMD                                                                                                                                     | DRUG: LX109                                                                                                       | NA              | 01-09-2023 | 30-09-2027 |
| 64 | NCT02671539 | THOR - Tubingen Choroideremia Gene Therapy Trial                                                                 | THOR           | COMPLETED               | Choroideremia                                                                                                                                                                                                                        | GENETIC: rAAV2.REP1                                                                                               | PHASE2          | 2016-01    | 2018-02    |
| 65 | NCT03507686 | A Safety Study of Retinal Gene Therapy for Choroideremia With Administration of BiIB111                          | GEMINI         | COMPLETED               | Choroideremia                                                                                                                                                                                                                        | DRUG: BiIB111                                                                                                     | PHASE2          | 29-11-2017 | 29-06-2022 |

Contd...

|    |             |                                                                                                                                                      |              |                         |                                                  |                                                      |               |            |            |
|----|-------------|------------------------------------------------------------------------------------------------------------------------------------------------------|--------------|-------------------------|--------------------------------------------------|------------------------------------------------------|---------------|------------|------------|
| 66 | NCT02341807 | Safety and Dose Escalation Study of AAV2-hCHM in Subjects With CHM (Choroideremia) Gene Mutations                                                    |              | COMPLETED               | Choroideremia CHM (Choroideremia) Gene Mutations | BIOLOGICAL: AAV2-hCHM                                | PHASE1 PHASE2 | 2015-01    | 12-10-2022 |
| 67 | NCT03496012 | Efficacy and Safety of BIIB111 for the Treatment of Choroideremia                                                                                    | STAR         | COMPLETED               | Choroideremia                                    | GENETIC: BIIB111                                     | PHASE3        | 11-12-2017 | 01-12-2020 |
| 68 | NCT03584165 | Long-term Safety and Efficacy Follow-up of BIIB111 for the Treatment of Choroideremia and BIIB112 for the Treatment of X-Linked Retinitis Pigmentosa | SOLSTICE     | ENROLLING_BY_INVITATION | Choroideremia X-Linked Retinitis Pigmentosa      | GENETIC: BIIB111 GENETIC: BIIB112                    | PHASE3        | 04-06-2018 | 04-06-2026 |
| 69 | NCT02077361 | An Open Label Clinical Trial of Retinal Gene Therapy for Choroideremia                                                                               |              | COMPLETED               | Choroideremia                                    | GENETIC: rAAV2.REP1 vector                           | PHASE1 PHASE2 | 2015-04    | 16-05-2022 |
| 70 | NCT02407678 | REP1 Gene Replacement Therapy for Choroideremia                                                                                                      | REGENERATE   | COMPLETED               | Choroideremia                                    | GENETIC: AAV-mediated REP1 gene replacement          | PHASE2        | 16-08-2016 | 23-07-2021 |
| 71 | NCT01461213 | Gene Therapy for Blindness Caused by Choroideremia                                                                                                   |              | COMPLETED               | Choroideremia                                    | DRUG: rAAV2.REP1                                     | PHASE1 PHASE2 | 2011-10    | 2017-10    |
| 72 | NCT02553135 | Choroideremia Gene Therapy Clinical Trial                                                                                                            |              | COMPLETED               | Choroideremia                                    | BIOLOGICAL: Injection of AAV2-REP1 (10e11 vg)        | PHASE2        | 2015-09    | 2018-02    |
| 73 | NCT05417126 | Safety and Effects of a Single Intravitreal Injection of vMCO-010 Optogenetic Therapy in Subjects With Stargardt Disease                             | STARLIGHT    | ACTIVE_NOT_RECRUITING   | Stargardt Disease                                | BIOLOGICAL: Gene Therapy-vMCO-010                    | PHASE2        | 05-07-2022 | 2023-10    |
| 74 | NCT02599922 | Safety and Efficacy Trial of AAV Gene Therapy in Patients With CNG3A3 Achromatopsia (A Clarity Clinical Trial)                                       |              | ACTIVE_NOT_RECRUITING   | Achromatopsia                                    | BIOLOGICAL: rAAV2YF-PR1.7-hCNGB3                     | PHASE1 PHASE2 | 11-04-2016 | 2026-07    |
| 75 | NCT02610582 | Safety and Efficacy of rAAV.hCNGA3 Gene Therapy in Patients With CNGA3-linked Achromatopsia                                                          | Colourbridge | RECRUITING              | Achromatopsia                                    | DRUG: rAAV.hCNGA3                                    | PHASE1 PHASE2 | 2015-11    | 2027-04    |
| 76 | NCT03001310 | Gene Therapy for Achromatopsia (CNGB3)                                                                                                               | CNGB3        | COMPLETED               | Achromatopsia                                    | BIOLOGICAL: AAV - CNGB3                              | PHASE1 PHASE2 | 16-01-2017 | 25-10-2019 |
| 77 | NCT03758404 | Gene Therapy for Achromatopsia (CNGA3)                                                                                                               | CNGA3        | COMPLETED               | Achromatopsia                                    | BIOLOGICAL: adeno-associated virus vector AAV- CNGA3 | PHASE1 PHASE2 | 12-08-2019 | 10-06-2021 |
| 78 | NCT02935517 | Safety and Efficacy Trial of AAV Gene Therapy in Patients With CNGA3 Achromatopsia (A Clarity Clinical Trial)                                        |              | ACTIVE_NOT_RECRUITING   | Achromatopsia                                    | BIOLOGICAL: AGTC-402                                 | PHASE1 PHASE2 | 03-08-2017 | 2026-08    |
| 79 | NCT03278873 | Long-Term Follow-Up Gene Therapy Study for Achromatopsia CNGB3 and CNGA3                                                                             |              | ACTIVE_NOT_RECRUITING   | Achromatopsia                                    | BIOLOGICAL: either AAV - CNGB3 or AAV - CNGA3        | PHASE1 PHASE2 | 29-06-2017 | 15-01-2026 |

Contid...





|     |                      |                                                                                                                                                                       |           |                         |                                               |                                                                                                                |            |            |
|-----|----------------------|-----------------------------------------------------------------------------------------------------------------------------------------------------------------------|-----------|-------------------------|-----------------------------------------------|----------------------------------------------------------------------------------------------------------------|------------|------------|
| 93  | NCT05607810          | Long-Term Follow-up Study of ADVM-022 in DME (INFINITY-EXT)                                                                                                           |           | ENROLLING_BY_INVITATION | Diabetic Macular Edema   Diabetic Retinopathy | GENETIC: ADVM-022                                                                                              | 10-08-2022 | 2026-03    |
| 94  | NCT05930561          | 4D-150 in Patients With Diabetic Macular Edema                                                                                                                        |           | RECRUITING              | Diabetic Macular Edema   Diabetic Retinopathy | BIOLOGICAL: 4D-150<br>IVT   BIOLOGICAL: Aflibercept IVT                                                        | 09-08-2023 | 01-07-2028 |
| 95  | NCT04418427          | ADVM-022 Intravitreal Gene Therapy for DME                                                                                                                            | INFINITY  | COMPLETED               | Diabetic Macular Edema   Diabetic Retinopathy | BIOLOGICAL: 6E11 vg/eye of<br>ADVM-022   BIOLOGICAL: 2E11 vg/eye of<br>ADVM-022   BIOLOGICAL: Aflibercept      | 28-05-2020 | 22-11-2022 |
| 96  | NCT04418427          | ADVM-022 Intravitreal Gene Therapy for DME                                                                                                                            | INFINITY  | COMPLETED               | Diabetic Macular Edema   Diabetic Retinopathy | BIOLOGICAL: 6E11<br>vg/eye of<br>ADVM-022   BIOLOGICAL : 2E11 vg/eye of<br>ADVM-022   BIOLOGICAL : Aflibercept | 28-05-2020 | 22-11-2022 |
| 97  | NCT05930561          | 4D-150 in Patients With Diabetic Macular Edema                                                                                                                        |           | RECRUITING              | Diabetic Macular Edema   Diabetic Retinopathy | BIOLOGICAL: 4D-150<br>IVT   BIOLOGICAL: Aflibercept IVT                                                        | 09-08-2023 | 01-07-2028 |
| 98  | NCT05607810          | Long-Term Follow-up Study of ADVM-022 in DME (INFINITY-EXT)                                                                                                           |           | ENROLLING_BY_INVITATION | Diabetic Macular Edema   Diabetic Retinopathy | GENETIC: ADVM-022                                                                                              | 10-08-2022 | 2026-03    |
|     | DR                   |                                                                                                                                                                       |           |                         |                                               |                                                                                                                |            |            |
| 99  | NCT04567550          | RGX-314 Gene Therapy Administered in the Suprachoroidal Space for Participants With Diabetic Retinopathy (DR) Without Center Involved-Diabetic Macular Edema (CI-DME) | ALTIITUDE | RECRUITING              | Diabetic Retinopathy (DR)                     | GENETIC: RGX-314 Dose 1   GENETIC: RGX-314 Dose 2   GENETIC: RGX-314 Dose 3   DRUG: Topical Steroid            | 20-11-2020 | 2024-10    |
| 100 | NCT04567550          | RGX-314 Gene Therapy Administered in the Suprachoroidal Space for Participants With Diabetic Retinopathy (DR) Without Center Involved-Diabetic Macular Edema (CI-DME) | ALTIITUDE | RECRUITING              | Diabetic Retinopathy (DR)                     | GENETIC: RGX-314 Dose 1   GENETIC: RGX-314 Dose 2   GENETIC: RGX-314 Dose 3   DRUG: Topical Steroid            | 20-11-2020 | 2024-10    |
|     | Retinal degeneration |                                                                                                                                                                       |           |                         |                                               |                                                                                                                |            |            |
| 101 | NCT00643747          | Safety Study of RPE65 Gene Therapy to Treat Leber Congenital Amaurosis                                                                                                |           | COMPLETED               | Retinal Degeneration                          | BIOLOGICAL: tgaAG76 (rAAV 2/2.hRPE65p.hRPE65)                                                                  | 2007-01    | 2014-12    |
|     | Retinoblastoma       |                                                                                                                                                                       |           |                         |                                               |                                                                                                                |            |            |

Contid...

|     |                                       |                                                                                                                              |     |                         |                                        |                                 |               |            |            |
|-----|---------------------------------------|------------------------------------------------------------------------------------------------------------------------------|-----|-------------------------|----------------------------------------|---------------------------------|---------------|------------|------------|
| 102 | NCT03284268                           | Evaluate Safety and the Oncolytic Adenovirus VCN-01 Activity in Patients With Refractory Retinoblastoma                      | RTB | RECRUITING              | Retinoblastoma, Recurrent              | GENETIC: VCN-01                 | NA            | 06-09-2017 | 30-06-2022 |
|     | <b>Bietti's Crystalline Dystrophy</b> |                                                                                                                              |     |                         |                                        |                                 |               |            |            |
| 103 | NCT04722107                           | Safety Study of rAAV2/8-hCYP4V2 in Patients With Bietti's Crystalline Dystrophy (BCD)                                        |     | RECRUITING              | Bietti's Crystalline Dystrophy         | DRUG: rAAV2/8-hCYP4V2           | EARLY_PHASE1  | 21-04-2021 | 29-04-2024 |
| 104 | NCT05399069                           | Safety and Tolerability of VGR-R01 in Patients With Bietti Crystalline Dystrophy                                             |     | RECRUITING              | Bietti Crystalline Dystrophy           | DRUG: VGR-R01                   | EARLY_PHASE1  | 15-09-2022 | 2024-05    |
| 105 | NCT05832684                           | Safety and Efficacy of ZVS101e in Patients With Bietti's Crystalline Dystrophy                                               |     | RECRUITING              | Bietti's Crystalline Dystrophy         | DRUG: ZVS101e                   | PHASE1 PHASE2 | 20-02-2023 | 2028-12    |
| 106 | NCT05694598                           | Safety and Tolerability of VGR-R01 for Patients With Bietti Crystalline Dystrophy                                            |     | NOT_YET_RECRUITING      | Bietti Crystalline Dystrophy           | GENETIC: VGR-R01                | PHASE1        | 01-03-2023 | 01-09-2025 |
|     | <b>Dry AMD</b>                        |                                                                                                                              |     |                         |                                        |                                 |               |            |            |
| 107 | NCT05984927                           | NG101 AAV Gene Therapy in Subjects With Wet Age-Related Macular Degeneration                                                 |     | RECRUITING              | Age-Related Macular Degeneration       | GENETIC: NG101 AAV gene therapy | PHASE1 PHASE2 | 2023-09    | 2030-01    |
| 108 | NCT05672121                           | Safety and Tolerability of KH631 Gene Therapy in Subjects With Neovascular Age-related Macular Degeneration (nAMD)           |     | NOT_YET_RECRUITING      | Age-Related Macular Degeneration       | DRUG: KH631                     | PHASE1 PHASE2 | 2023-01    | 2026-12    |
| 109 | NCT05481827                           | ORACLE: A Long-term Follow-up Study to Evaluate the Safety and Durability of GT005 in a Gyroscope-sponsored Antecedent Study |     | ENROLLING_BY_INVITATION | Age Related Macular Degeneration (AMD) | GENETIC: GT005                  |               | 12-07-2022 | 16-09-2028 |
| 110 | NCT03144999                           | Treatment of Advanced Dry Age Related Macular Degeneration With AAVCAGsCD59                                                  |     | COMPLETED               | Dry Age-related Macular Degeneration   | BIOLOGICAL: AAVCAGsCD59         | PHASE1        | 29-03-2017 | 09-12-2019 |
